# Supplementary material for: MOF-associated complexes ensure stem cell identity and Xist repression
Source: eLife journal article supplement (doi:10.7554/elife.02024), 2014-05-19
Supplement: supp [file elife-02024-supp-v1.zip]

Archive with 18 entries (18 files):
- elife_poa_e02024_Figure_7_figure_supplement_1.pdf
- elife_poa_e02024_Supplementary_file_1.xlsx
- elife_poa_e02024_Figure_3_figure_supplement_1.pdf
- elife_poa_e02024_Supplementary_file_3.xlsx
- elife_poa_e02024_Figure_4_figure_supplement_1.pdf
- elife_poa_e02024_Supplementary_file_2.xlsx
- elife_poa_e02024_Figure_3_figure_supplement_4.pdf
- elife_poa_e02024_Figure_6_figure_supplement_1.pdf
- elife_poa_e02024_Figure_5_figure_supplement_1.pdf
- elife_poa_e02024_Figure_3_figure_supplement_2.pdf
- elife_poa_e02024_Figure_4_figure_supplement_4.pdf
- elife_poa_e02024_Figure_2_figure_supplement_1.pdf
- elife_poa_e02024_Figure_1_figure_supplement_2.pdf
- elife_poa_e02024_Figure_4_figure_supplement_3.pdf
- elife_poa_e02024_Figure_1_figure_supplement_1.pdf
- elife_poa_e02024_Figure_3_figure_supplement_3.pdf
- elife_poa_e02024_Figure_7_figure_supplement_2.pdf
- elife_poa_e02024_Figure_4_figure_supplement_2.pdf
