# Supplementary material for: MOF-associated complexes ensure stem cell identity and Xist repression
Source: eLife journal article supplement (doi:10.7554/elife.02024), 2014-05-19

**A**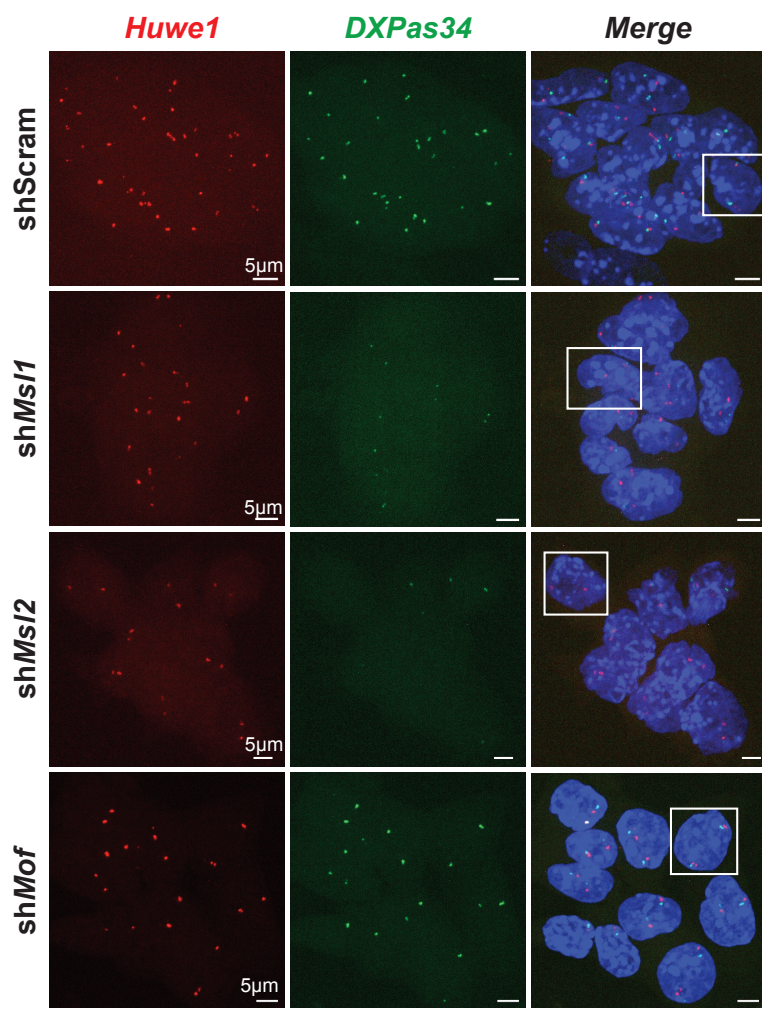**B**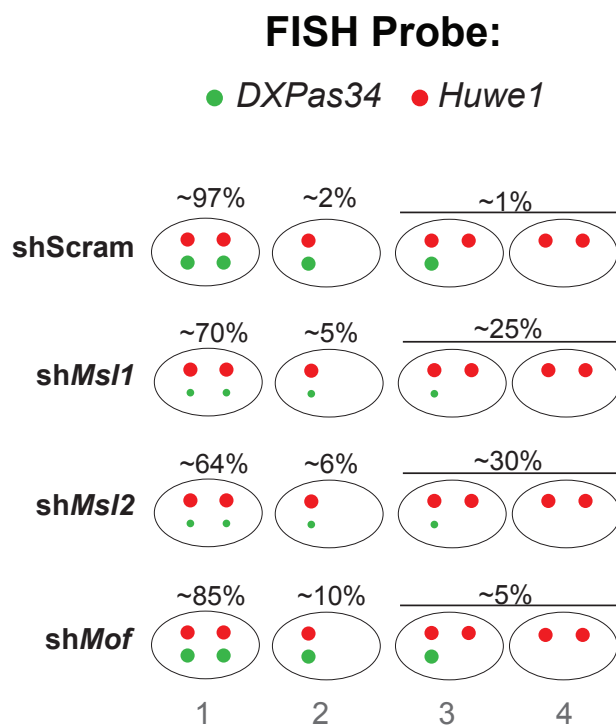**C**

**FISH Probe: *DXPas34* / *Huwe1***

|                                                                                                          | shScram | shMof | shMsi1 | shMsi2 |
|----------------------------------------------------------------------------------------------------------|---------|-------|--------|--------|
| Number of cells counted:                                                                                 | 303     | 238   | 262    | 210    |
| Number of cells with: <b>2 X-chromosomes</b>                                                             | 296     | 214   | 248    | 198    |
| Number of cells with: <b>1 X-chromosome</b>                                                              | 7       | 24    | 14     | 12     |
| Number of cells with: <b>2x <i>Huwe1</i> / 2x <i>Tsix</i> signal</b>                                     | 292     | 202   | 187    | 134    |
| Number of cells with: <b>2x <i>Huwe1</i> / 1x <i>Tsix</i> or 2x <i>Huwe1</i> / 0x <i>Tsix</i> signal</b> | 4       | 12    | 61     | 64     |

**D**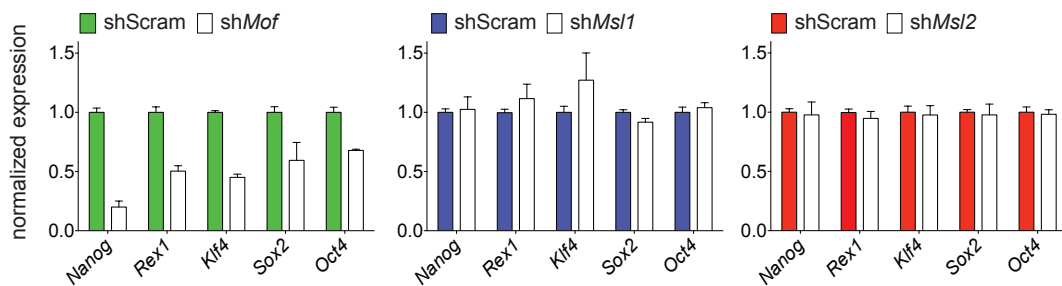**E**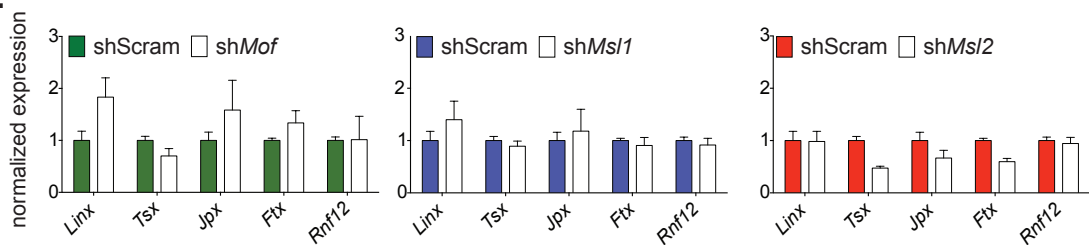

Supplement: supp [file elife-02024-supp-v1.zip › elife_poa_e02024_Figure_6_figure_supplement_1.pdf]
