# Supplementary material for: MOF-associated complexes ensure stem cell identity and Xist repression
Source: eLife journal article supplement (doi:10.7554/elife.02024), 2014-05-19
Supplement: supp [file elife-02024-supp-v1.zip › elife_poa_e02024_Figure_7_figure_supplement_1.pdf]

**A**

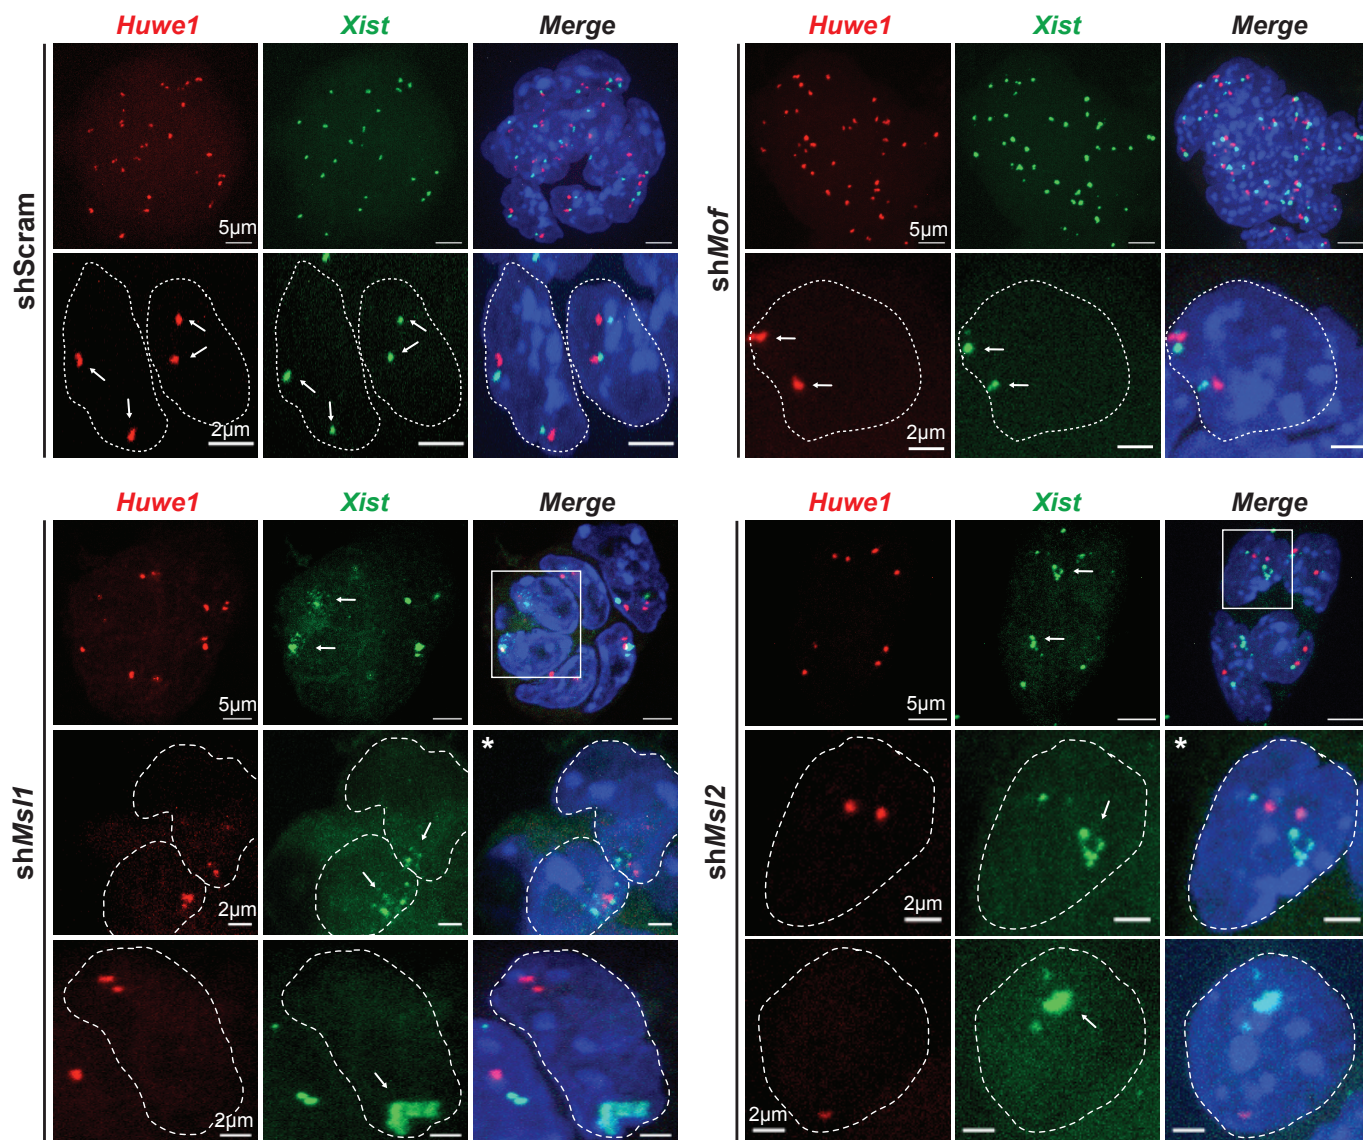

**B**

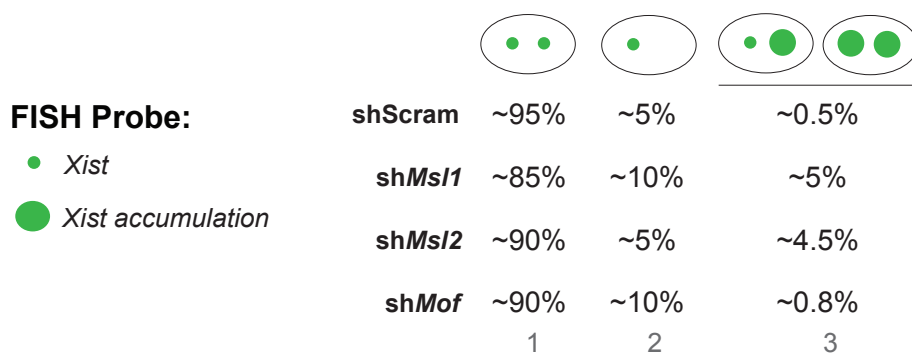

**C**

♀ ESC FISH Probe: *Xist* / *Huwe1*

|                                             | shScram | shMof | shMsl1 | shMsl2 |
|---------------------------------------------|---------|-------|--------|--------|
| Number of cells counted:                    | 454     | 245   | 185    | 226    |
| Number of cells with: 2 X-chromosomes       | 430     | 219   | 166    | 215    |
| Number of cells with: 1 X-chromosome        | 24      | 26    | 19     | 11     |
| Number of cells with: X-chromosomal coating | 2       | 2     | 10     | 10     |
