# Supplementary material for: MOF-associated complexes ensure stem cell identity and Xist repression
Source: eLife journal article supplement (doi:10.7554/elife.02024), 2014-05-19
Supplement: supp [file elife-02024-supp-v1.zip › elife_poa_e02024_Figure_7_figure_supplement_2.pdf]

A

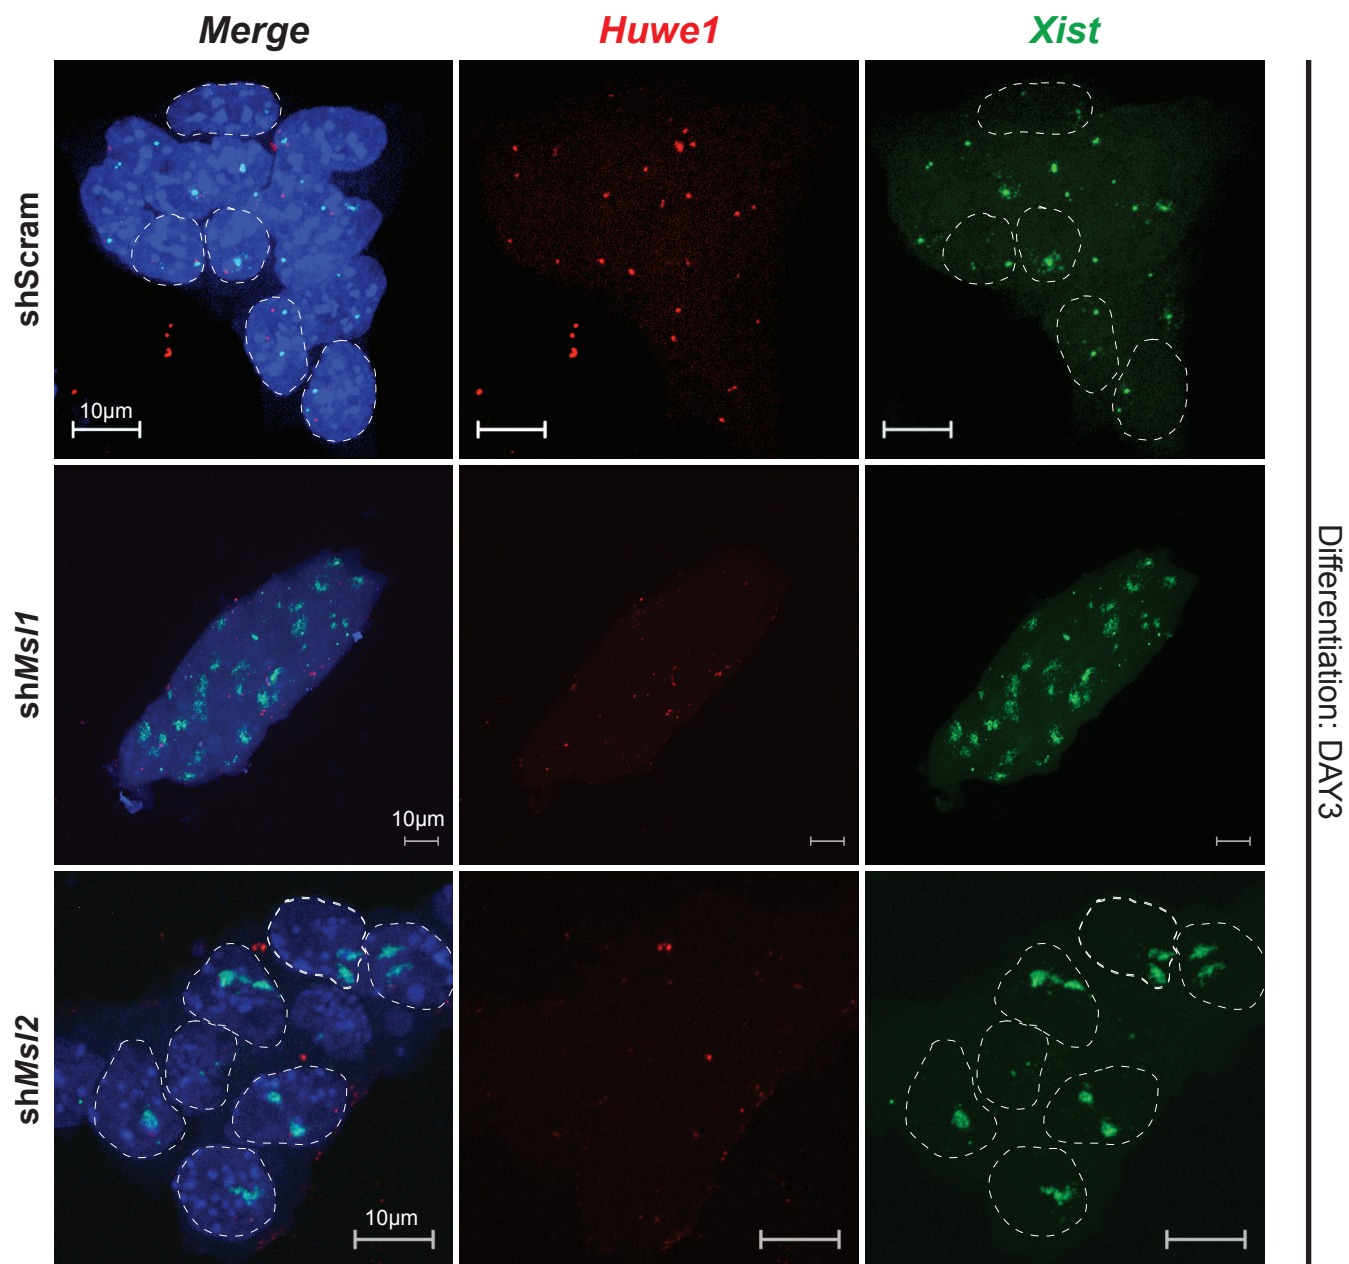

B

| FISH Probe: <i>Xist</i> / <i>Huwe1</i> |                                 | shScram     | shMsi1      | shMsi2      | shMof       |
|----------------------------------------|---------------------------------|-------------|-------------|-------------|-------------|
| Number of cells counted:               |                                 | 253         | 209         | 285         | 239         |
| Number of cells with:                  | <b>0 <i>Xist</i> Clouds</b> ● ● | 154 (60.9%) | 77 (36.9%)  | 111 (38.9%) | 118 (49.4%) |
| Number of cells with:                  | <b>1 <i>Xist</i> Cloud</b> ● ●  | 97 (38.3%)  | 110 (52.6%) | 148 (52%)   | 113 (47.3%) |
| Number of cells with:                  | <b>2 <i>Xist</i> Clouds</b> ● ● | 2 (0.8%)    | 22 (10.5%)  | 26 (9.1%)   | 8 (3.3%)    |
