# Supplementary material for: MOF-associated complexes ensure stem cell identity and Xist repression
Source: eLife journal article supplement (doi:10.7554/elife.02024), 2014-05-19
Supplement: supp [file elife-02024-supp-v1.zip › elife_poa_e02024_Supplementary_file_1.xlsx]

## Sheet: a) Mapping statistics
DNA/ChIP	Replicate	Cell type	Number of mapped reads (after filtering)
Input	A	murine embryonic stem cells	62015271
	B		27165955
MOF	A		23301475
	B		34868363
MSL1	A		28305740
	B		20294918
MSL2	A		15836350
	B		11075882
KANSL3	A		21652973
	B		15330976
MCRS1	A		19694427
	B		20684372
Input	A	murine neuronal progenitor cells	106186268
	B		102349563
MOF	A		65005766
	B		75101426
MSL2	A		116116612
	B		112618589
KANSL3	A		82801583
	B		93620726

## Sheet: b) Peak statistics
ChIP	Cell type	Number of peaks (after filtering)	Median size
MOF	mESC	2882	907 bp
MSL1		1435	837 bp
MSL2		3716	710 bp
KANSL3		5505	1,098 bp
MCRS1		15720	2,761 bp
MOF	mNPC	1194	1,334 bp
MSL2		6195	938 bp
KANSL3		7799	1,877 bp
