# Supplementary material for: MOF-associated complexes ensure stem cell identity and Xist repression
Source: eLife journal article supplement (doi:10.7554/elife.02024), 2014-05-19
Supplement: supp [file elife-02024-supp-v1.zip › elife_poa_e02024_Supplementary_file_2.xlsx]

## Sheet: Sheet1
Sample	Downloaded data	Source or GEO accession no.
H3K4me1, H3K27ac enhancers	.bed-file of peaks1)	from publication (Creyghton, M. P. et al. (2010). PNAS, 107(50), 21931–6. doi:10.1073/pnas.1016071107)
Super/Typical enhancers	.bed-files of regions	from publication (Whyte, W. et al., Cell, 153(2), 307–19. doi:10.1016/j.cell.2013.03.035)
ChIP-seq of Pol II in ESC	.wig-file of signal	GSM632040
ChIP-seq of Pol II in NPC	.wig-file of signal	GSM632050
ChIP-seq of p300 in ESC	.wig-file of signal	GSM723018
ChIP-seq of H3K4me1 in ESC	.wig-file of signal	GSM723016
ChIP-seq of H3K27ac in ESC	FASTQ file2)	GSM1005503
CpG methylation in ESC	.tsv-file of counts	GSE30202
CpG methylation in NPC	.tsv-file of counts	GSE30202
DNase hypersensitivity	.wig-file of signal	from UCSC Genome Browser: wgEncodeUwDnaseEscj7S129ME0SigRep1
1) peaks were lifted over to genome version mm9; active enhancers were defined as H3K27ac peaks with/without H3K4me1 peaks, poised enhancers were defined by the presence of H3K4me1 without H3K27ac peaks
2) reads were mapped and processed using bowtie2 and deepTools modules to obtain sequencing-depth-normalized coverage files
