# Supplementary material for: MOF-associated complexes ensure stem cell identity and Xist repression
Source: eLife journal article supplement (doi:10.7554/elife.02024), 2014-05-19
Supplement: supp [file elife-02024-supp-v1.zip › elife_poa_e02024_Supplementary_file_3.xlsx]

## Sheet: a) TSS ChIP validation
Number	Name	Sequence (5'-3')
1	Kdm3a-Promoter-for	TGGGCTGATGGGTGAAATGG
2	Kdm3a-Promoter-rev	TCCTTCAAAATGGCGGACCT
3	Kdm3a-End-for	GCAGTTACTCCCCAGCTGTT
4	Kdm3a-End-rev	CCAACGAAACTTCGCAGTGA
5	Ing4a-Promoter-for	GTCGCAGACACATATTGCCG
6	Ing4a-Promoter-rev	GCGCCTATTCACGGTCATCT
7	Ing4-End-for	CCATGGGGAGGGGTCTTCTA
8	Ing4-End-rev	GCATAAATCCCCGGGCCATA
9	Cdk10-Promoter-for	AGTGTGTCTGCATCTAACGCT
10	Cdk10-Promoter-rev	CGCATGACGTACTTCCGGTT
11	Cdk10-End-for	CCCAAGGAGAGGATTGGTGG
12	Cdk10-End-rev	TTGCATGGATCGAAACCCCA
13	Eny2-Promoter-for	TTCACTCCTGGAACTGAGGC
14	Eny2-Promoter-rev	CTTCCCAGAAGAGACGTGGC
15	Eny2-End-for	GGAGGTGAGTCTGCCATGTT
16	Eny2-End-rev	GCATATGGGCAGTGAGGCTA
17	Nedd8-Promoter-for	AGTTGTAGTTCTTCTGCCGCT
18	Nedd8-Promoter-rev	AATTCTAGCTTCGGGCGCTG
19	Nedd8-End-for	GCTGCTGTCTTCTCATCATTCC
20	Nedd8-End-rev	AGGCCTCTCAGAGATCCACC
21	Cpsf1-Promoter-for	GACTCGGGGGACAGGGAC
22	Cpsf1-Promoter-rev	GAAGCGCAGGCGCAGTA
23	Cpsf1-End-for	AGGATCTGTGGGTGATGGAGA
24	Cpsf1-End-rev	GTACCACGCCTGACATTGTG
25	Tbp-Promoter-for	CTTCCCAGTGTCTCACAGCTT
26	Tbp-Promoter-rev	ACATCTGATGCCGTCACTTCC
27	Tbp-End-for	TCCATGTGTCTTTGTAGGTGC
28	Tbp-End-rev	TGTGGTCTTCCTGAATCCCTT
29	Cbr4-Promoter-for	TGCTCACAAGTGCAAGAGAGT
30	Cbr4-Promoter-rev	ACAAGGCGCGAGGATTAGAC
31	Cbr4-End-for	TCTTTTAGGATTTATTCGCACGGA
32	Cbr4-End-rev	TCTCCAAACCTCCCAAGAGGA

## Sheet: b) Primers for ChIP at DXPas34
Number	Name	Sequence (5'-3)
1	DXPas34-(1)-4kb-US-for	ACCACATCCCCCATATGCTA
2	DXPas34-(1)-4kb-US-rev	TGCTGAGAATCATTGGTGTCA
3	DXPas34-(2)-3.5kb-US-for	TGTATAGGCAAAGCCGGACC
4	DXPas34-(2)-3.5kb-US-rev	TCCTTATGCTTGGAATGGCGA
5	DXPas34-(3)-3.0kb-US-for	CACAAGTTCAATGGGCCTCC
6	DXPas34-(3)-3.0kb-US-rev	GTCACTGGTCCTTGGGGAGA
7	DXPas34-(4)-5'-P2-US-for	TACCTGCTGGCCTAGCTTTC
8	DXPas34-(4)-5'-P2-US-rev	GGACCTTGTGGGAGTCACAG
9	DXPas34-(5)-P2-for	GCCTCAAGAGCCTTAGGTCC
10	DXPas34-(5)-P2-rev	ATCTTGCGAGATTGCGCCT
11	DXPas34-(6)-for	GCCCTTGCTCTGTTCTCACT
12	DXPas34-(6)-rev	GCTGGCTATCACGCTCTTCT
13	DXPas34-(7)-for	AGATGCCTAAAGTGCCTGCG
14	DXPas34-(7)-rev	ACTTAGCCATCGCCCCACTA
15	DXPas34-(8)-for	CAGTGGCAAAGTGCTTTCAGG
16	DXPas34-(8)-rev	AGGAATCTTTCTGCTGCTTGG
17	DXPas34-(9)-for	TGCCGCATAACGGAGGAATA
18	DXPas34-(9)-rev	TCTTTCCAGGTCCCTGACCG
19	DXPas34-(10)-for	ATGGCTCAAATGGATGCCTG
20	DXPas34-(10)-rev	TTAGTGACCTCCCAGTACCC
21	DXPas34-(11)-for	CTGCCGTCGAGGATCTGG
22	DXPas34-(11)-rev	AAGCGGTGGCAGGCA
23	DXPas34-(12)-for	GGCAGAGCAGAGGTGATGAA
24	DXPas34-(12)-rev	ACGCTTTGCATATCTACCTGT
25	DXPas34-(13)-for	CACATCAGGGAAAGCCTCGT
26	DXPas34-(13)-rev	CACGTGCGGTGAGGTAGTAT
27	DXPas34-(14)-for	CCGCTTTAGTGGGGTTTTCTG
28	DXPas34-(14)-rev	TGGTTACTTCACACGCTACCAG
29	DXPas34-(15)-for	TGGTAGCGTGTGAAGTAACCA
30	DXPas34-(15)-rev	CCTCGGAAATAAACGGAACGC
31	DXPas34-(16)-for	AGAAGAGCTCAGCAGTTAGCAG
32	DXPas34-(16)-rev	GGGTTGTGAGCTACCTGACTT

## Sheet: c) Expression analyses
Name	Sequence (5'-3')
Hprt-for	GTATACCTAATCATTATGCCGAGGA
Hprt-rev	GACATCTCGAGCAAGTCTTTCA
Msl1-for	TAGAGGAGCTGAAGTCCGAGAG
Msl1-rev	TTTCCTTCTCGTTATCCCTCTTC
Msl2-for	GGTTATCATGTACAGCAGCAACTC
Msl2-rev	GTAGAAATTGGAAGTGGCTGAACT
Mof-for	AACCAGAAGTCACCGTGGAG
Mof-rev	TCCTGGTCATTCACTCGAGAC
Kansl1-for	TGACCTGTAAGAAACGGAGGC
Kansl1-rev	ACAGCCAGAGCGGACATTAC
Kansl3-for	CAGATGCAGATGCTCCTCCT
Kansl3-rev	CAGGGCTTTGAGGATCTTGTT
Mcrs1-for	CTGGCAGCTCATGAAACAGTA
Mcrs1-rev	AGAAGTTGAGCACTTGGTCCC
Tsix-for	TGGAAGAAGAGCGTGATAGCC
Tsix-rev	TAACCATCTCTTCCGCTGTCC
Xist-for	GGATCCTGCTTGAACTACTGC
Xist-rev	CAGGCAATCCTTCTTCTTGAG
Rex1-for	AACCCATTCTGGAAGAGGATTT
Rex1-rev	AAGACTCGAGAAGGGAACTCG
Klf4-for	CCAGCAAGTCAGCTTGTGAA
Kfl4-rev	GGGCATGTTCAAGTTGGATT
Sox2-for	CACAGATGCAACCGATGCA
Sox2-rev	GGTGCCCTGCTGCGAGTA
Nanog-for	CCTCCAGCAGATGCAAGAAC
Nanog-rev	CTTCAACCACTGGTTTTTCTGC
Oct4-for	AGCCGACAACAATGAGAACC
Oct4-rev	TCTCCAGACTCCACCTCACAC
Jpx-for	GCACCACCAGGCTTCTGTAAC
Jpx-rev	GGGCATGTTCATTAATTGGCCAG
Ftx-for	GCTTTCAACTGCTTCCCAAG
Ftx-rev	TCAGAAATTATGCCGCTTTTG
Tsx-for	ACCCACAAGCTGACCAAGACCTG
Tsx-rev	ACACGTTTCTGCCTGCCTGCT
Fgf5-for	GCTGTGTCTCAGGGGATTGT
Fgf5-rev	CACTCTCGGCCTGTCTTTTC
Nestin-for	TGAGGGTCAGGTGGTTCTG
Nestin-rev	AGAGCAGGGAGGGACATTC
Rplp0-for	TCCAGAGGCACCATTGAAATT
Rplp0-rev	TCGCTGGCTCCCACCTT
Vimentin-for	GAGGTGGAGCGGGACAAC
Vimentin-rev	TTCGGCTTCCTCTCTCTGGA
Olig2-for	GCTTAGATCATCCCTGGGGC
Olig2-rev	AGATCATCGGGTTCTGGGGA
