# Supplementary figures and images for: MOF-associated complexes ensure stem cell identity and Xist repression
Source: eLife journal article supplement (doi:10.7554/elife.02024), 2014-05-19

**A**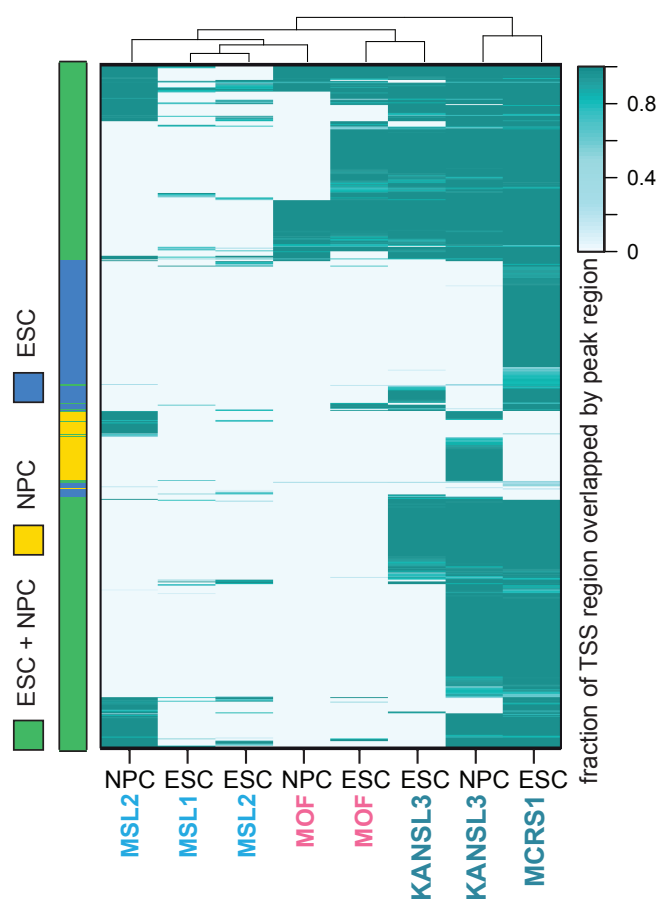**B**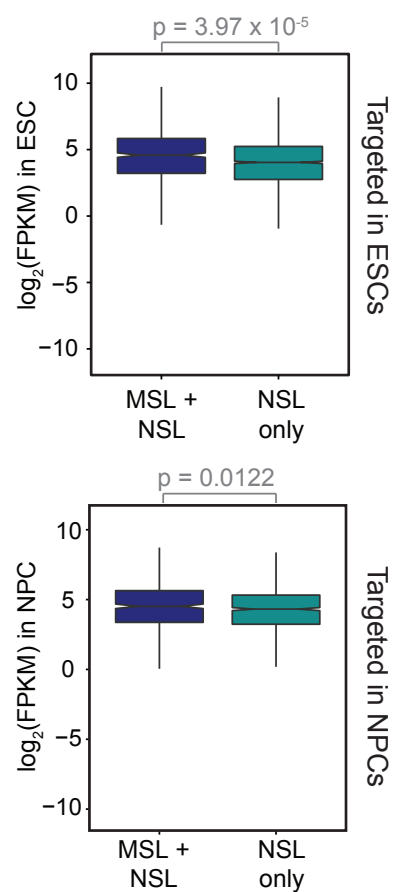**C**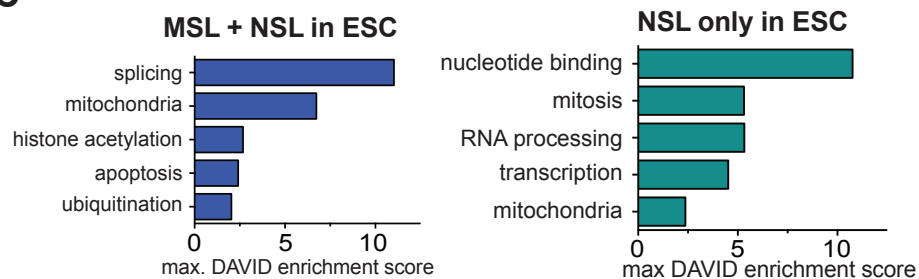**D**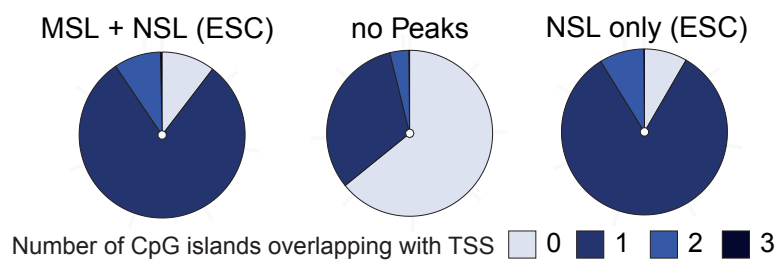

Supplement: supp [file elife-02024-supp-v1.zip › elife_poa_e02024_Figure_3_figure_supplement_1.pdf]

**A**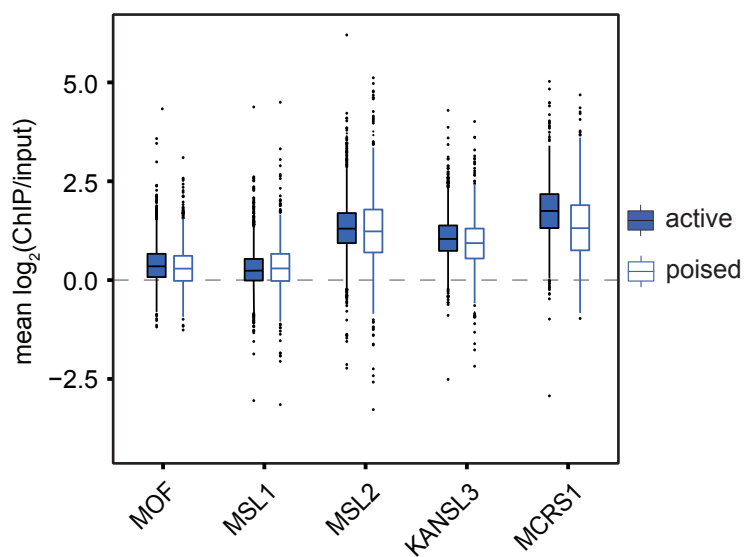**B**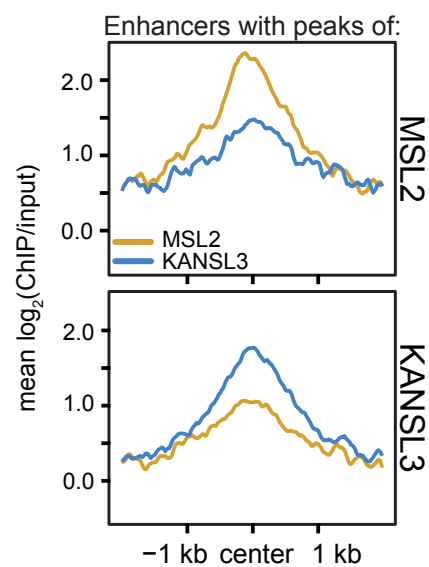**C**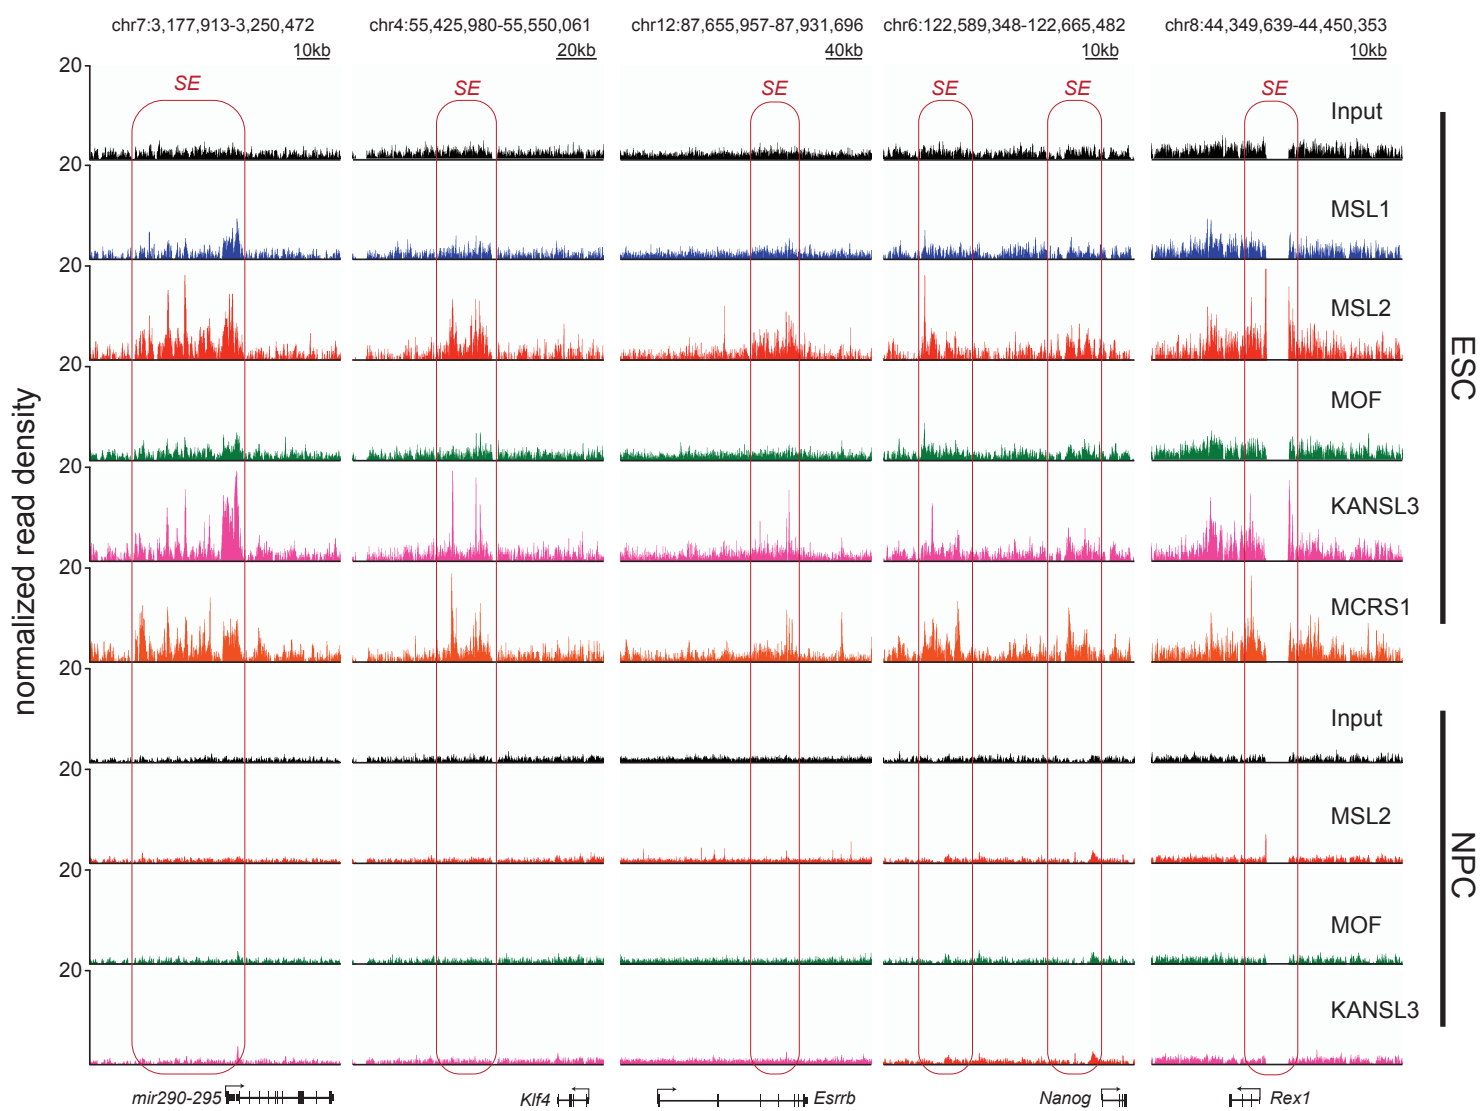

Supplement: supp [file elife-02024-supp-v1.zip › elife_poa_e02024_Figure_4_figure_supplement_1.pdf]

**A**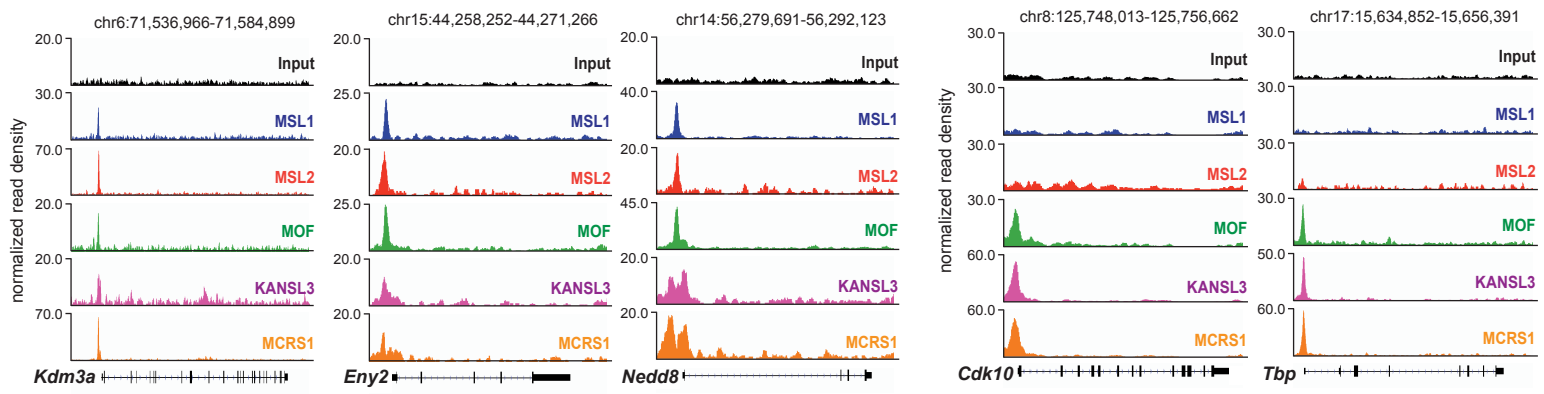**B**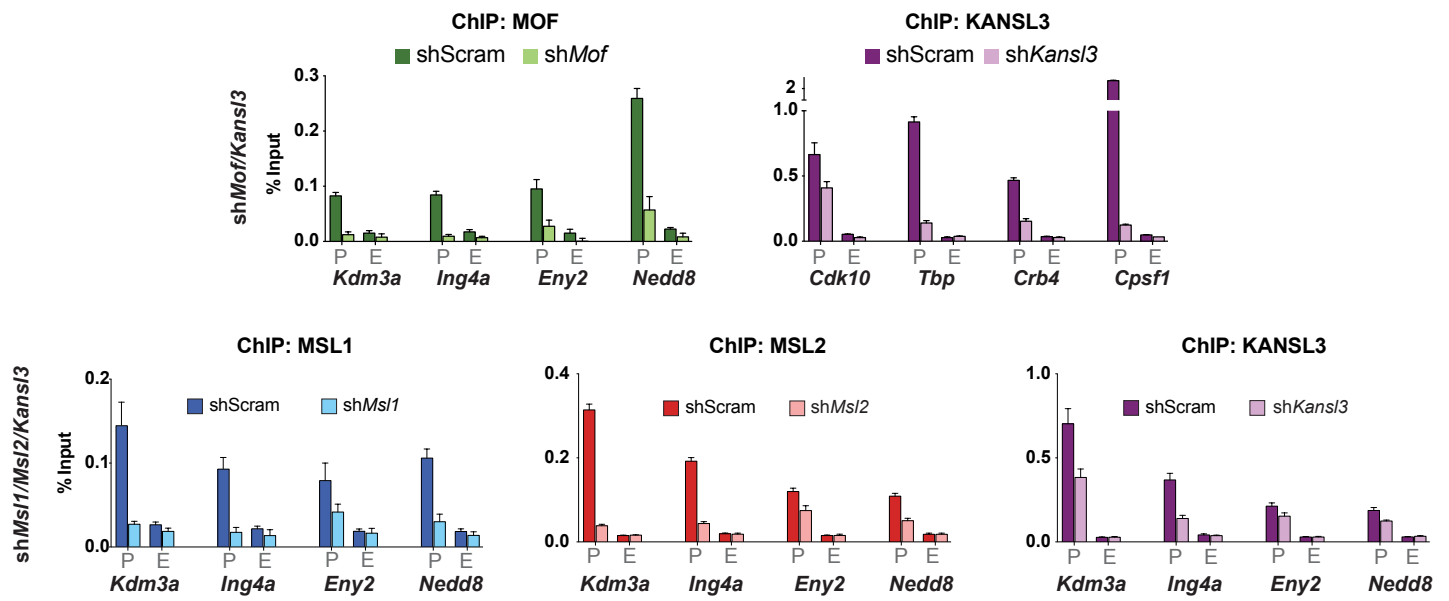**C**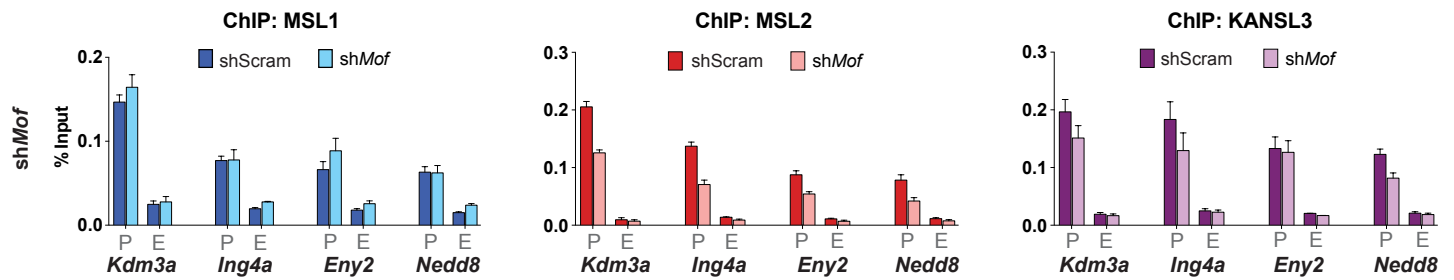

Supplement: supp [file elife-02024-supp-v1.zip › elife_poa_e02024_Figure_3_figure_supplement_4.pdf]

**A**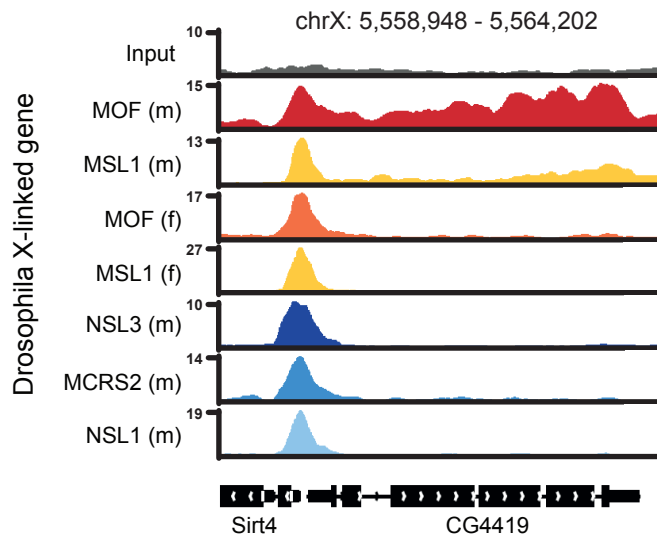**B**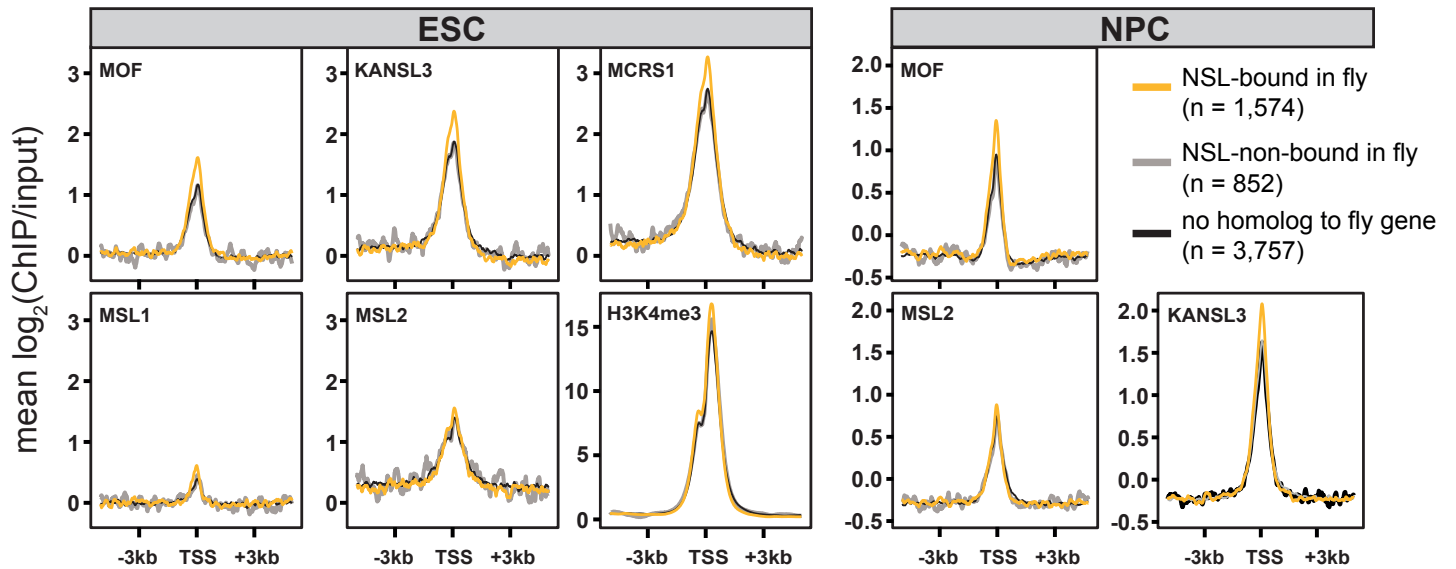

Supplement: supp [file elife-02024-supp-v1.zip › elife_poa_e02024_Figure_3_figure_supplement_2.pdf]

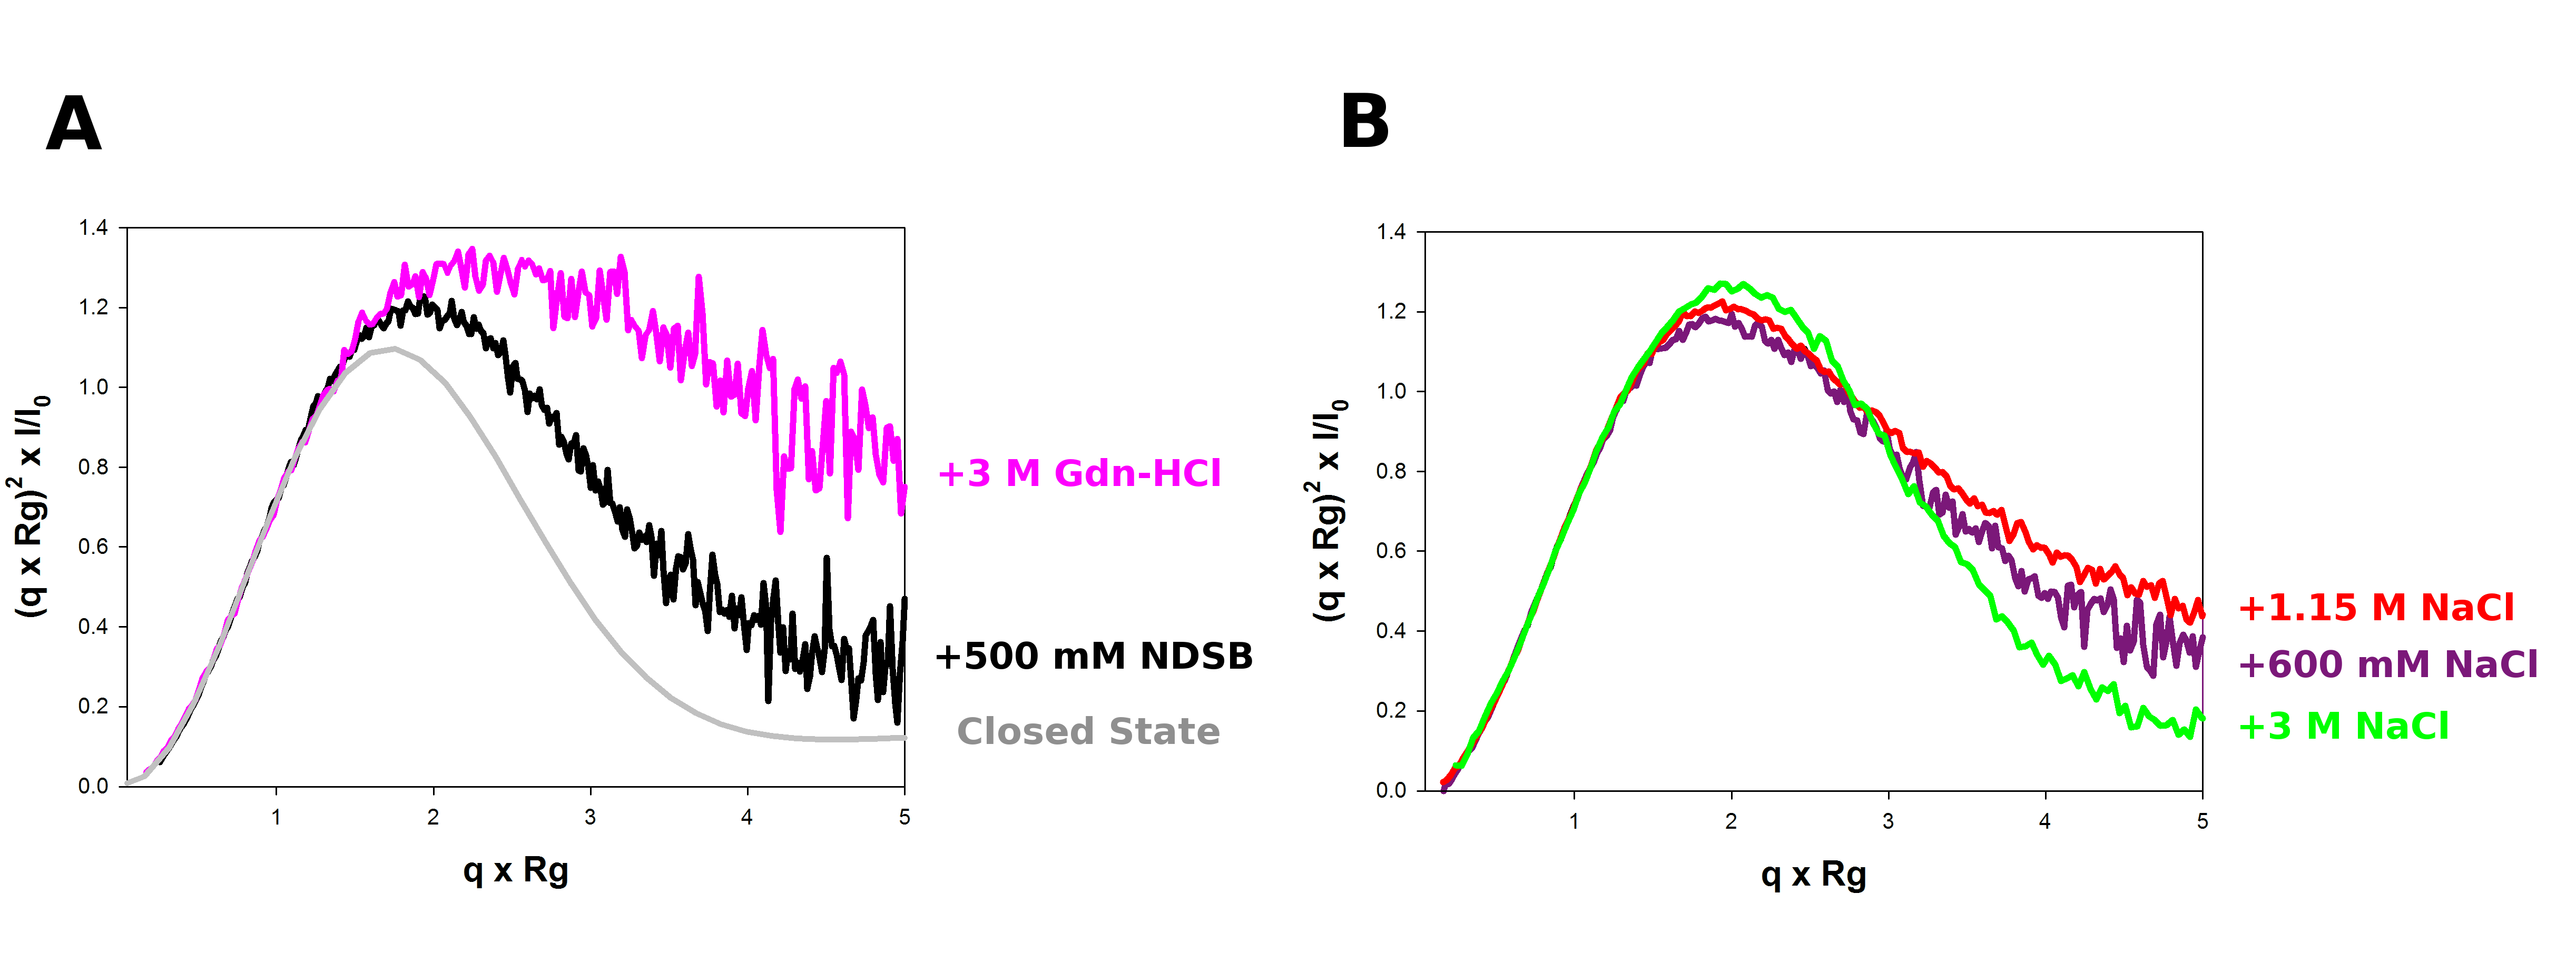

Supplement: supp [file elife-02024-supp-v1.zip › elife_poa_e02024_Figure_4_figure_supplement_4.pdf]

**A**

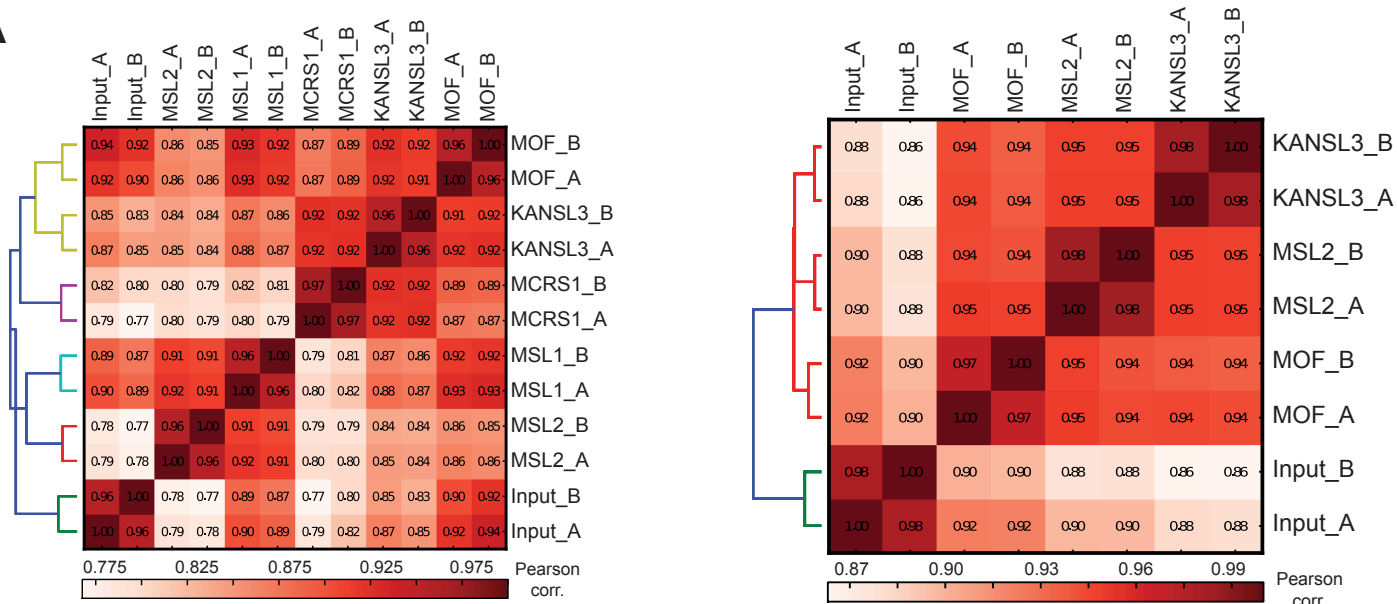

**B**

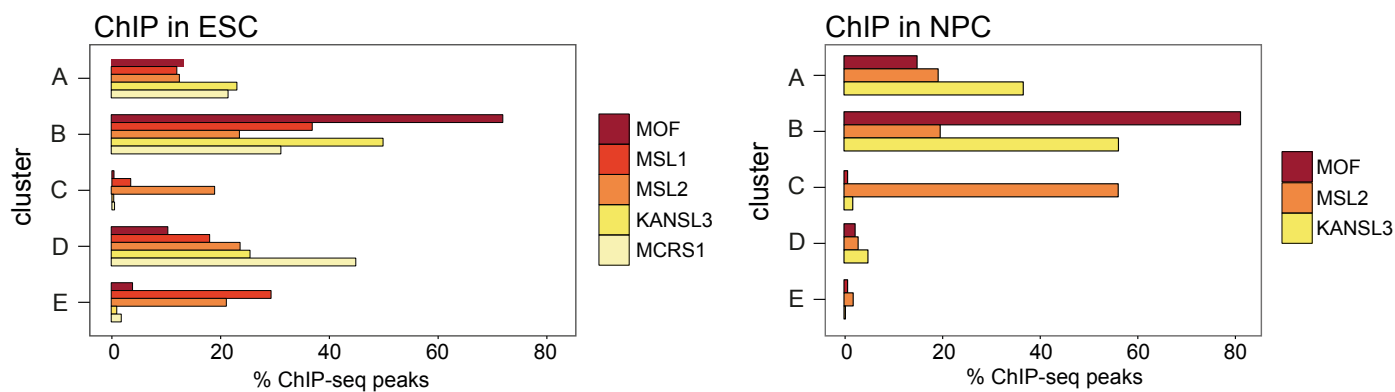

Supplement: supp [file elife-02024-supp-v1.zip › elife_poa_e02024_Figure_2_figure_supplement_1.pdf]

**A**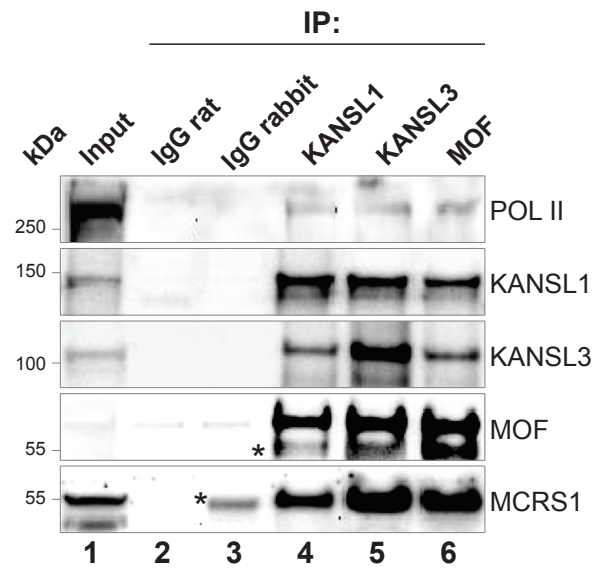**B**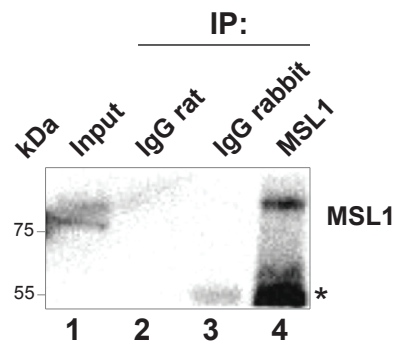**C**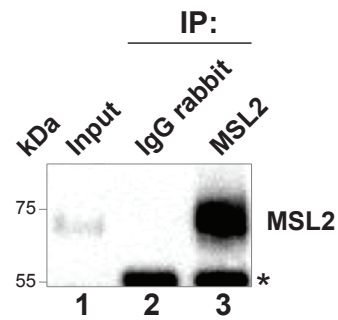

Supplement: supp [file elife-02024-supp-v1.zip › elife_poa_e02024_Figure_1_figure_supplement_2.pdf]

**A**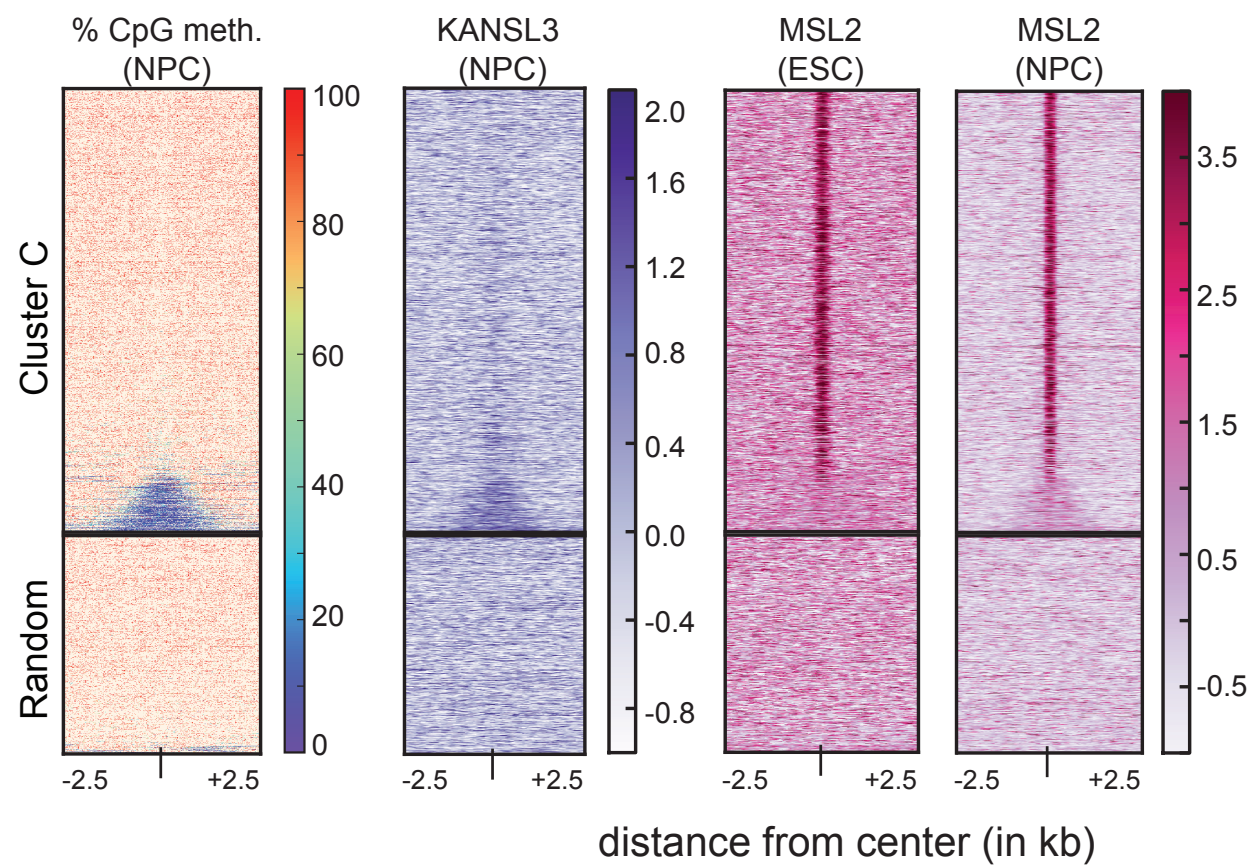**C**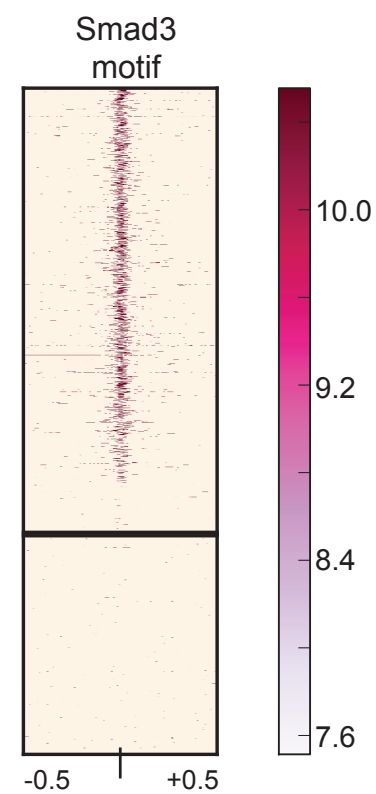**B**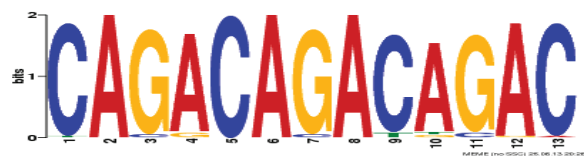

Supplement: supp [file elife-02024-supp-v1.zip › elife_poa_e02024_Figure_4_figure_supplement_3.pdf]

**A**

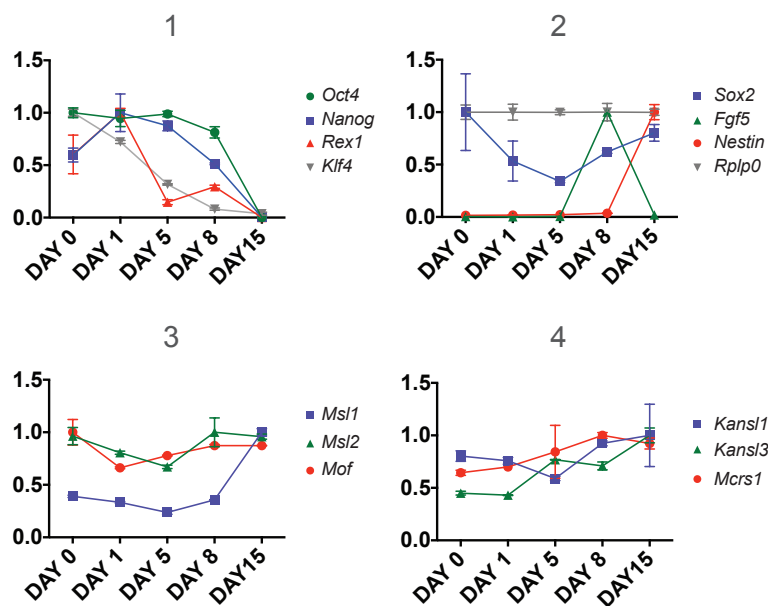

**B**

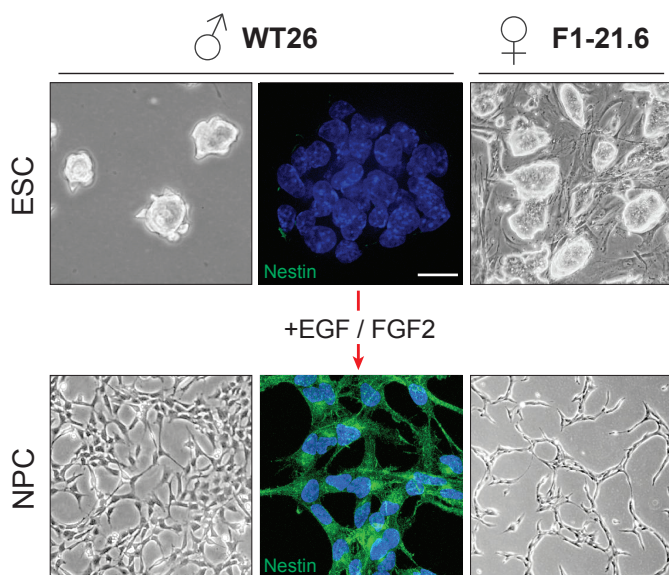

**C**

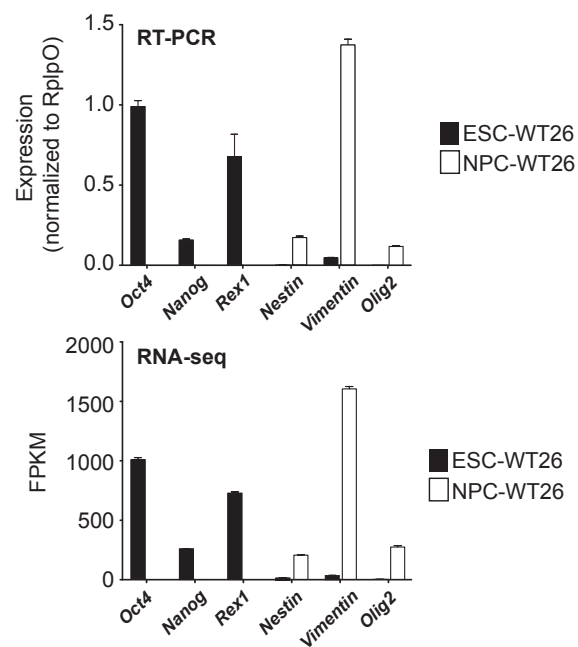

**D**

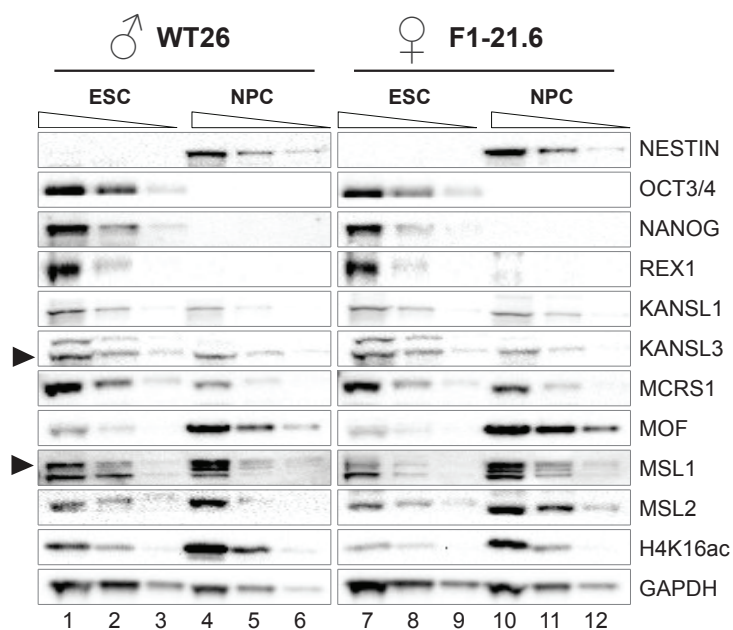

Supplement: supp [file elife-02024-supp-v1.zip › elife_poa_e02024_Figure_1_figure_supplement_1.pdf]

**A**

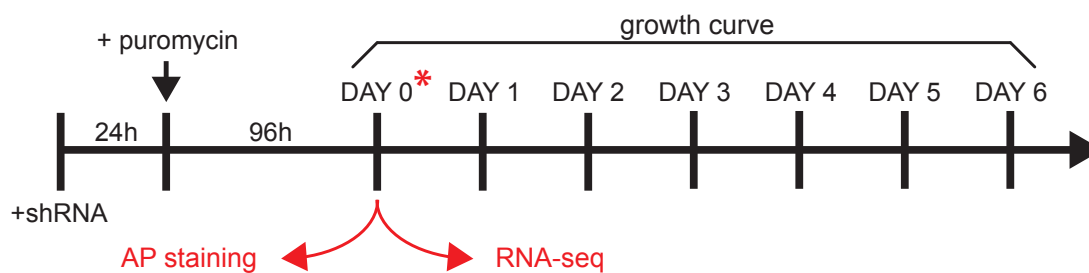

**B**

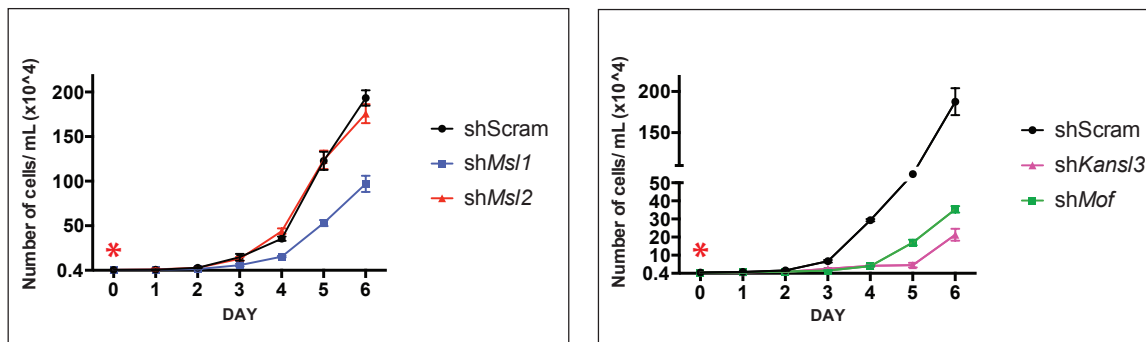

**C**

**TSS-bound**

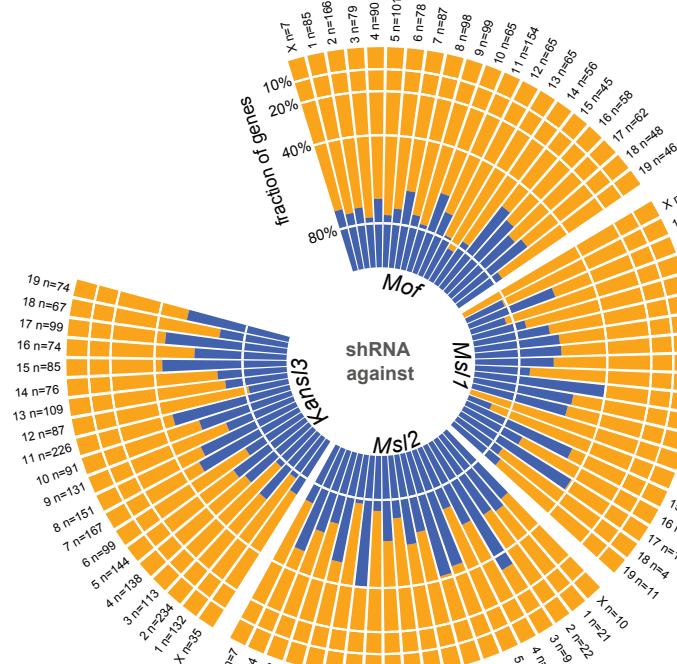

**not targeted**

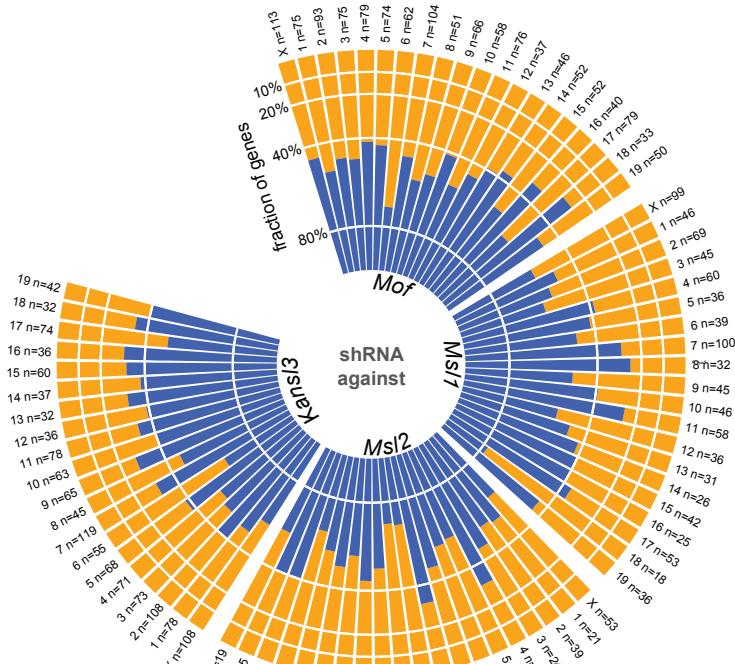

Expression change:

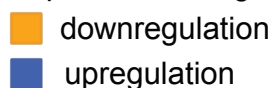

Supplement: supp [file elife-02024-supp-v1.zip › elife_poa_e02024_Figure_3_figure_supplement_3.pdf]

**A**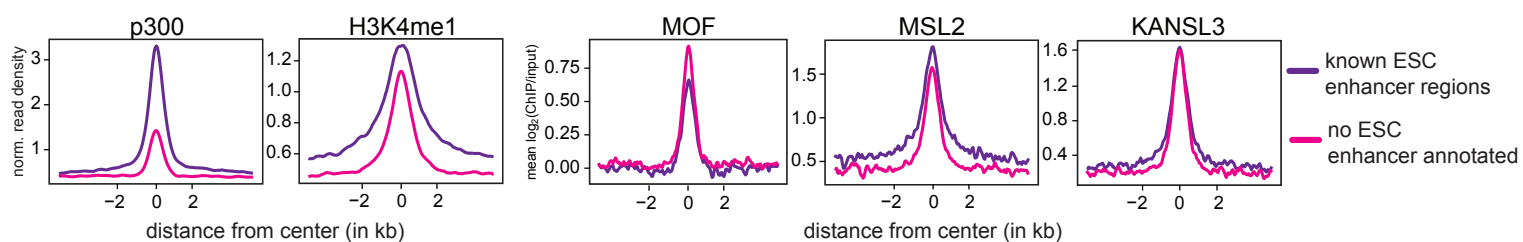**B**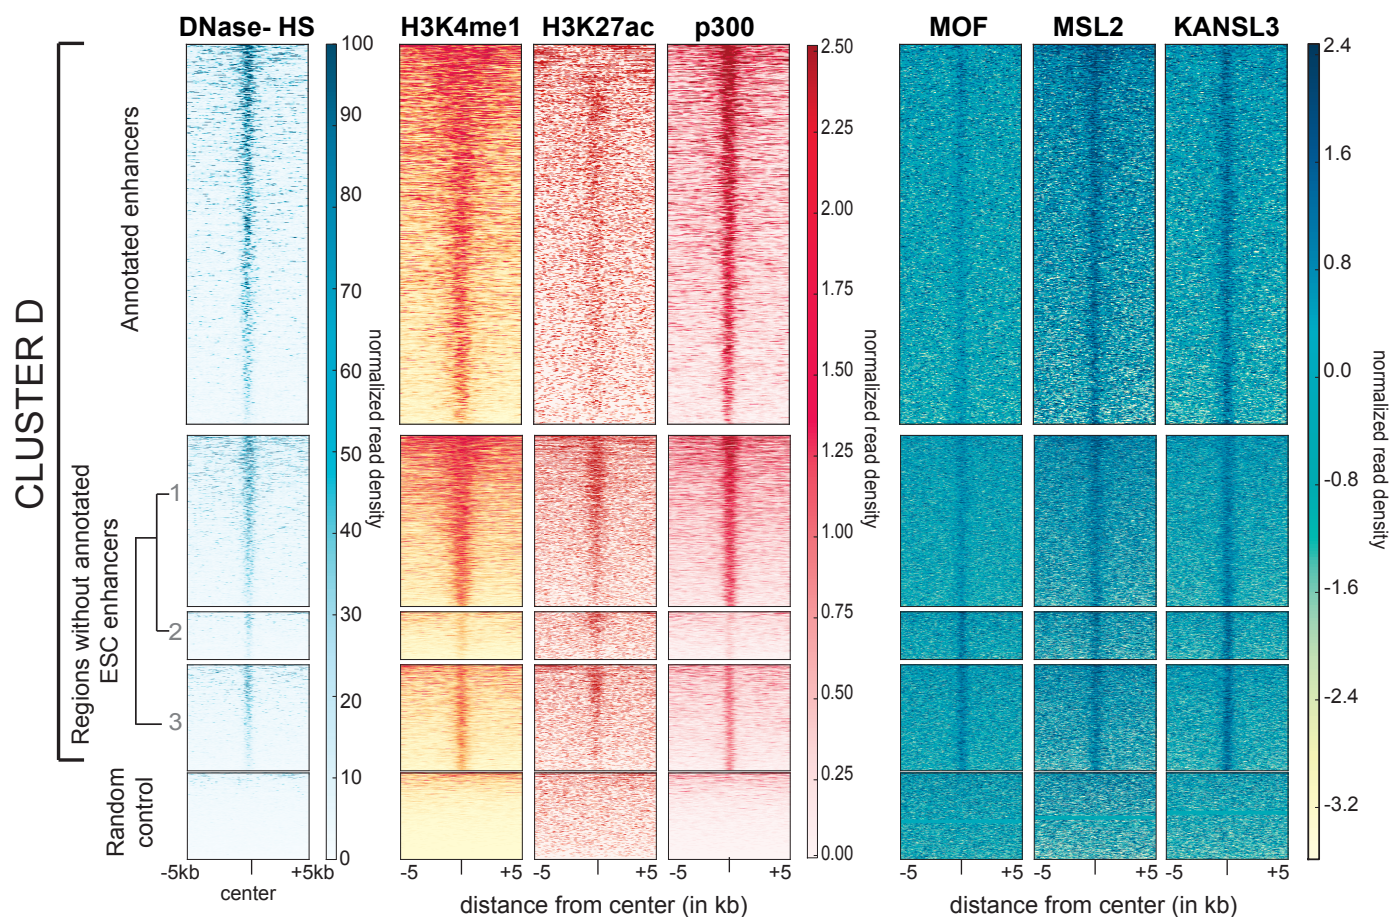**C**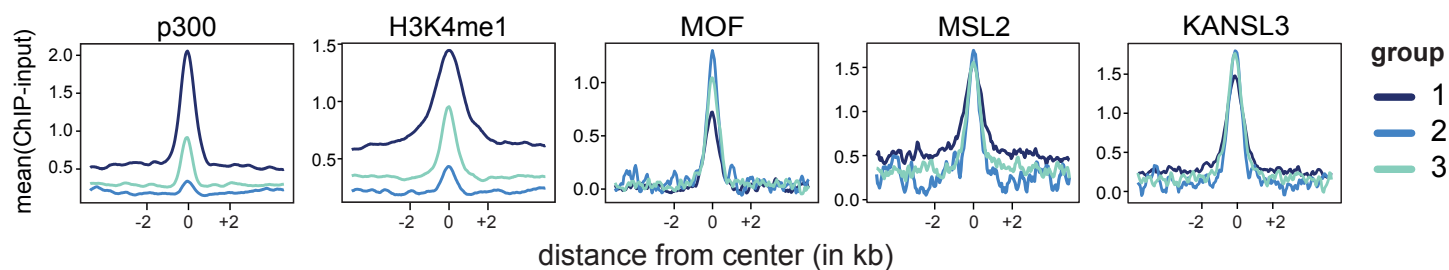

Supplement: supp [file elife-02024-supp-v1.zip › elife_poa_e02024_Figure_4_figure_supplement_2.pdf]
